# Supplementary material for: Synthesis, Anti-tubulin and Antiproliferative SAR of Steroidomimetic Dihydroisoquinolinones
Source: PubMed Central journal article supplement (PMC4114533; doi:10.1002/cmdc.201400017), 2014-03-05
Supplement: cmdc-9-798-sd1.pdf [file cmdc-9-798-sd1.pdf]

## Supporting Information

© Copyright Wiley-VCH Verlag GmbH & Co. KGaA, 69451 Weinheim, 2014

### **Synthesis, Anti-tubulin and Antiproliferative SAR of Steroidomimetic Dihydroisoquinolinones**

Mathew P. Leese,<sup>[a]</sup> Fabrice L. Jourdan,<sup>[a]</sup> Meriel R. Major,<sup>[a]</sup> Wolfgang Dohle,<sup>[a]</sup>  
Mark P. Thomas,<sup>[a]</sup> Ernest Hamel,<sup>[b]</sup> Eric Ferrandis,<sup>[c]</sup> Mary F. Mahon,<sup>[d]</sup> Simon P. Newman,<sup>[e]</sup>  
Atul Purohit,<sup>[e]</sup> and Barry V. L. Potter<sup>\*[a]</sup>

cmdc\_201400017\_sm\_miscellaneous\_information.pdf

**Contents:**

|                                |                  |
|--------------------------------|------------------|
| <b><sup>13</sup>C NMR Data</b> | <b>Pages 1-4</b> |
| <b>Elemental Analyses</b>      | <b>Pages 4-6</b> |
| <b>Computational Methods</b>   | <b>Pages 6-7</b> |

**<sup>13</sup>C NMR data for selected compounds.**

**4** (67.5 MHz, CDCl<sub>3</sub>):  $\delta$  = 25.4, 36.4, 51.3, 104.0, 111.1, 129.5, 146.9, 150.9, 152.5, 206.0.

**6a** (67.5 MHz, CDCl<sub>3</sub>):  $\delta$  = 28.0, 40.5, 56.3, 70.9, 110.6, 111.7, 121.8, 127.3, 128.1, 128.7, 132.4, 136.5, 148.4, 151.4, 166.4.

**6c** (67.5 MHz, CDCl<sub>3</sub>):  $\delta$  = 13.0, 18.0, 27.8, 40.5, 55.6, 111.0, 118.9, 122.1, 132.3, 149.2, 150.0, 166.9.

**7a** (67.5 MHz, CDCl<sub>3</sub>):  $\delta$  = 27.9, 45.4, 46.3, 55.4, 56.3, 65.9, 110.2, 110.3, 111.1, 111.2, 120.7, 120.8, 122.3, 124.9, 125.6, 128.2, 128.4, 128.9, 129.4, 131.7, 148.4, 151.1, 156.5, 157.6, 164.8.

**7b1** (67.5 MHz, CDCl<sub>3</sub>):  $\delta$  = 13.0, 18.0, 27.5, 45.7, 50.4, 55.3, 55.6, 111.5, 112.8, 113.6, 118.5, 120.4, 122.6, 129.6, 131.5, 139.3, 148.9, 150.0, 159.9, 164.6.

**7b2** (67.5 MHz, CDCl<sub>3</sub>):  $\delta$  = 27.6, 45.6, 50.4, 55.2, 56.2, 70.8, 111.5, 112.6, 112.8, 113.6, 118.5, 119.4, 120.4, 122.3, 129.7, 129.8, 131.6, 138.2, 139.3, 148.5, 151.0, 159.9, 164.7.

**7c** (67.5 MHz, CDCl<sub>3</sub>):  $\delta$  = 13.0, 18.0, 27.4, 45.6, 49.9, 55.3, 55.6, 111.5, 113.9, 118.5, 122.4, 129.5, 129.9, 131.4, 148.8, 150.0, 158.9, 164.8.

**7d** (67.5 MHz, CDCl<sub>3</sub>):  $\delta$  = 27.8, 45.5, 50.5, 55.5, 56.3, 70.9, 99.3, 106.0, 111.2, 111.5, 122.3, 127.3, 128.1, 128.8, 131.6, 136.6, 140.2, 148.6, 151.0, 161.1, 164.7.

**7e** (67.5 MHz, CDCl<sub>3</sub>):  $\delta$  = 27.8, 45.5, 50.6, 56.3, 61.0, 70.9, 105.0, 111.2, 111.5, 122.3, 127.2, 128.1, 128.8, 131.5, 133.5, 136.5, 137.2, 148.6, 151.1, 153.5, 164.7.

**8a** (67.5 MHz, CDCl<sub>3</sub>):  $\delta$  = 27.7, 45.5, 46.3, 55.5, 56.3, 110.3, 110.5, 112.7, 120.7, 121.9, 125.7, 128.4, 129.3, 132.6, 145.5, 148.9, 157.6, 164.9.

**8b** (67.5 MHz, CDCl<sub>3</sub>):  $\delta$  = 27.6, 45.6, 50.4, 55.3, 56.3, 110.6, 112.7, 112.9, 113.6, 120.4, 121.7, 129.8, 132.5, 139.4, 145.7, 148.9, 159.9, 164.7.

**8c** (67.5 MHz, CDCl<sub>3</sub>):  $\delta$  = 27.5, 45.5, 49.9, 55.3, 56.2, 110.6, 112.8, 114.0, 121.5, 129.4, 129.7, 132.4, 145.8, 149.0, 159.0, 164.8.

## Supporting information

**8d** (67.5 MHz, CDCl<sub>3</sub>):  $\delta$  = 27.6, 45.6, 50.5, 55.5, 56.3, 99.3, 105.9, 110.6, 112.7, 121.6, 132.6, 140.2, 145.7, 148.9, 161.1, 164.8.

**8e** (67.5 MHz, CDCl<sub>3</sub>):  $\delta$  = 27.7, 45.5, 50.6, 56.2, 56.3, 61.0, 104.9, 110.5, 112.8, 121.6, 132.5, 133.5, 137.2, 145.7, 149.0, 153.5, 164.8.

**9a** (67.5 MHz, CDCl<sub>3</sub>):  $\delta$  = 27.1, 45.8, 46.1, 55.4, 56.7, 110.4, 113.0, 120.8, 122.8, 125.1, 128.8, 129.4, 129.6, 131.7, 141.1, 150.4, 157.6, 163.6.

**9b** (67.5 MHz, CDCl<sub>3</sub>):  $\delta$  = 27.1, 45.8, 50.7, 55.3, 56.6, 113.0, 113.1, 113.7, 120.3, 122.9, 128.9, 129.8, 131.5, 138.6, 141.2, 150.6, 159.9, 163.6.

**9c** (67.5 MHz, CDCl<sub>3</sub>/methanol-*d*<sub>4</sub> 10:1):  $\delta$  = 27.0, 45.3, 50.2, 55.3, 56.4, 112.8, 114.1, 122.7, 128.6, 129.0, 129.4, 131.3, 141.3, 150.6, 159.1, 163.8.

**9d** (67.5 MHz, CDCl<sub>3</sub>):  $\delta$  = 27.0, 46.0, 50.4, 55.7, 56.5, 99.3, 106.0, 112.4, 122.3, 128.1, 131.7, 140.5, 141.8, 151.0, 161.2, 163.3.

**9e** (67.5 MHz, DMSO-*d*<sub>6</sub>):  $\delta$  = 27.0, 45.8, 50.4, 56.4, 56.5, 56.6, 105.3, 112.5, 122.3, 128.2, 131.8, 133.9, 137.1, 141.8, 151.0, 153.5, 163.9.

**10a** (67.5 MHz, CDCl<sub>3</sub>):  $\delta$  = 28.5, 45.3, 56.2, 56.3, 70.9, 111.1, 111.2, 112.1, 120.8, 120.9, 127.3, 127.5, 128.3, 128.8, 132.4, 133.7, 135.4, 136.1, 148.8, 152.5, 156.6, 163.4.

**10b** (67.5 MHz, CDCl<sub>3</sub>):  $\delta$  = 28.5, 45.1, 55.7, 56.1, 70.8, 111.0, 111.1, 113.2, 119.9, 120.3, 120.6, 127.1, 128.2, 128.7, 129.8, 133.4, 135.9, 140.4, 148.8, 152.6, 159.5, 163.3.

**10c** (67.5 MHz, CDCl<sub>3</sub>):  $\delta$  = 28.7, 45.0, 55.7, 56.2, 71.0, 111.1, 111.2, 114.0, 120.9, 127.2, 128.3, 128.8, 130.8, 130.9, 133.5, 136.0, 148.9, 152.6, 163.5, 163.7.

**10d** (67.5 MHz, CDCl<sub>3</sub>):  $\delta$  = 28.7, 45.2, 56.2, 71.0, 111.1, 111.3, 120.4, 126.9, 127.2, 128.3, 128.4, 128.9, 130.1, 133.6, 133.8, 135.0, 135.9, 141.0, 149.0, 152.9, 163.4.

**10e** (67.5 MHz, CDCl<sub>3</sub>):  $\delta$  = 28.3, 44.9, 53.2, 56.2, 70.9, 111.0, 111.3, 120.7, 127.3, 128.3, 128.8, 129.1, 130.6, 132.3, 133.4, 133.7, 134.0, 136.1, 137.9, 148.8, 152.7, 163.5, 167.2.

**11a** (67.5 MHz, CDCl<sub>3</sub>):  $\delta$  = 28.4, 45.3, 56.3, 56.3, 110.7, 112.1, 112.9, 120.4, 120.7, 127.6, 132.4, 134.6, 135.4, 145.9, 150.5, 156.6, 163.4.

**11b** (67.5 MHz, CDCl<sub>3</sub>):  $\delta$  = 28.4, 45.1, 55.7, 56.2, 110.6, 112.8, 113.1, 120.0, 120.2, 120.3, 129.8, 134.4, 140.5, 145.9, 150.6, 159.5, 163.3.

**11c** (67.5 MHz, CDCl<sub>3</sub>):  $\delta$  = 23.4, 44.9, 55.6, 56.2, 110.5, 112.8, 113.9, 120.2, 130.7, 130.8, 134.4, 145.9, 150.5, 163.4, 163.6.

**11d** (67.5 MHz, CDCl<sub>3</sub>):  $\delta$  = 28.5, 45.3, 56.3, 110.6, 113.0, 119.9, 126.9, 128.5, 130.1, 133.8, 134.6, 135.0, 141.0, 146.1, 150.9, 163.4.

**11e** (67.5 MHz, CDCl<sub>3</sub>):  $\delta$  = 28.2, 44.9, 53.2, 56.3, 110.5, 112.9, 120.2, 129.1, 130.5, 132.4, 133.3, 133.7, 134.9, 137.9, 145.9, 150.6, 163.6, 167.3.

Supporting information

- 12a** (67.5 MHz, DMSO-*d*<sub>6</sub>):  $\delta$  = 27.7, 45.6, 56.6, 57.0, 112.6, 113.6, 120.8, 122.5, 126.5, 127.3, 131.8, 133.5, 136.3, 143.4, 151.3, 157.0, 162.4.
- 12c** (100 MHz, DMSO-*d*<sub>6</sub>):  $\delta$  = 27.2, 44.8, 55.8, 56.1, 112.0, 114.2, 121.9, 125.8, 130.1, 130.6, 132.9, 142.9, 150.7, 162.1, 163.4.
- 12d** (67.5 MHz, DMSO-*d*<sub>6</sub>):  $\delta$  = 27.7, 45.5, 56.7, 112.6, 122.5, 126.0, 127.3, 128.2, 131.8, 133.7, 134.1, 134.6, 141.2, 143.6, 151.3, 162.9.
- 12e** (67.5 MHz, DMSO-*d*<sub>6</sub>):  $\delta$  = 27.5, 45.0, 53.8, 56.6, 112.6, 122.5, 126.2, 129.7, 131.3, 132.7, 133.0, 133.5, 134.8, 137.0, 143.5, 151.3, 162.6, 167.5.
- 14f** (67.5 MHz, CDCl<sub>3</sub>):  $\delta$  = 27.8 and 29.0, 40.5 and 49.5, 44.4 and 45.3, 55.5, 56.1, 71.1, 101.9, 104.6, 105.0, 109.2, 109.9, 110.7, 114.2, 125.6, 127.3, 128.0, 128.7, 137.1, 138.1, 146.9, 160.9.
- 15a** (67.5 MHz, CDCl<sub>3</sub>):  $\delta$  = 28.3, 43.4, 55.7, 56.2, 70.9, 110.8, 111.2, 111.4, 120.8, 121.1, 127.3, 127.5, 128.3, 128.5, 128.9, 131.5, 134.8, 136.1, 148.7, 152.6, 155.6, 165.0, 170.8.
- 15b** (67.5 MHz, CDCl<sub>3</sub>):  $\delta$  = 28.2, 44.6, 55.5, 56.2, 71.0, 111.4, 111.5, 113.2, 117.4, 120.4, 120.7, 127.3, 128.3, 128.9, 129.2, 134.5, 136.1, 138.0, 148.9, 152.8, 159.4, 165.6, 174.5.
- 15c** (67.5 MHz, CDCl<sub>3</sub>):  $\delta$  = 28.1, 44.4, 56.1, 71.0, 111.3, 111.4, 112.4, 118.1, 120.0, 127.1, 128.2, 127.8, 129.0, 131.5, 131.9, 134.3, 134.5, 135.8, 138.0, 149.0, 153.1, 165.4, 172.1.
- 15d** (67.5 MHz, CDCl<sub>3</sub>):  $\delta$  = 29.7, 44.9, 55.5, 56.2, 70.9, 111.3, 111.5, 113.4, 121.1, 127.3, 128.3, 128.5, 128.9, 130.9, 134.4, 136.1, 148.7, 152.6, 158.3, 162.6, 174.1.
- 15e** (67.5 MHz, CDCl<sub>3</sub>):  $\delta$  = 27.5, 44.3, 55.2, 55.3, 55.4, 70.2, 109.2, 110.6, 110.7, 110.8, 120.8, 122.5, 127.2, 128.2, 128.5, 128.7, 134.3, 136.0, 148.6, 148.8, 152.1, 152.6, 165.7, 174.2.
- 15f** (67.5 MHz, CDCl<sub>3</sub>):  $\delta$  = 28.2, 44.6, 55.6, 56.1, 71.0, 103.4, 105.8, 111.4, 111.5, 120.7, 127.2, 128.2, 128.8, 134.5, 136.0, 138.7, 148.8, 152.7, 160.4, 165.5, 174.5.
- 15g** (67.5 MHz, CDCl<sub>3</sub>):  $\delta$  = 28.2, 45.0, 56.2, 56.3, 61.0, 71.0, 105.7, 111.4, 111.5, 120.7, 127.3, 128.4, 128.9, 131.8, 134.4, 136.1, 141.1, 148.9, 152.8, 152.9, 165.6, 174.4.
- 16a** (67.5 MHz, DMSO-*d*<sub>6</sub>):  $\delta$  = 27.8, 43.5, 56.1, 111.7, 111.9, 114.5, 119.2, 120.8, 128.2, 128.5, 131.4, 136.1, 147.5, 152.6, 155.8, 164.7, 170.3.
- 16b** (67.5 MHz, DMSO-*d*<sub>6</sub>):  $\delta$  = 27.7, 45.0, 55.8, 56.1, 111.7, 113.8, 114.6, 116.9, 118.9, 120.7, 129.7, 136.2, 138.8, 147.5, 152.7, 159.4, 165.4, 174.2.
- 16c** (67.5 MHz, acetone-*d*<sub>6</sub>):  $\delta$  = 27.4, 44.5, 55.5, 111.2, 112.0, 113.9, 118.1, 119.4, 129.3, 131.5, 132.2, 133.9, 136.2, 139.0, 147.0, 152.1, 165.1, 172.0.
- 16d** (67.5 MHz, DMSO-*d*<sub>6</sub>):  $\delta$  = 27.2, 44.8, 55.4, 55.6, 111.2, 113.3, 114.1, 118.6, 128.4, 130.7, 135.5, 146.9, 152.0, 162, 165.1, 173.6.

## Supporting information

**16e** (100 MHz, DMSO-*d*<sub>6</sub>):  $\delta$  = 27.2, 44.9, 55.5, 55.6, 55.7, 110.6, 111.2, 111.6, 114.1, 118.6, 122.6, 128.5, 135.5, 147.0, 148.1, 151.8, 152.1, 165.1, 173.7.

**16f** (67.5 MHz, CDCl<sub>3</sub>):  $\delta$  = 28.1, 44.7, 55.6, 56.2, 103.3, 105.8, 111.0, 113.1, 120.1, 135.4, 138.8, 146.0, 150.8, 160.2, 165.5, 174.4.

**16g** (67.5 MHz, CDCl<sub>3</sub>):  $\delta$  = 28.0, 45.0, 56.2, 56.3, 61.0, 105.7, 111.0, 113.2, 120.2, 131.9, 135.4, 141.1, 146.1, 150.8, 152.9, 165.6, 174.4.

**17a** (100 MHz, DMSO-*d*<sub>6</sub>):  $\delta$  = 27.4, 43.4, 56.0, 56.1, 111.4, 112.4, 120.3, 122.0, 126.3, 127.2, 128.1, 131.2, 133.8, 142.7, 150.6, 155.4, 163.7, 169.9.

**17b** (100 MHz, DMSO-*d*<sub>6</sub>):  $\delta$  = 26.8, 44.4, 55.3, 56.0, 112.4, 113.4, 116.7, 120.3, 122.1, 126.0, 129.3, 134.0, 137.8, 142.9, 150.6, 158.9, 164.3, 173.7.

**17c** (67.5 MHz, acetone-*d*<sub>6</sub>):  $\delta$  = 27.0, 44.5, 55.7, 112.1, 112.7, 118.0, 123.0, 126.8, 129.4, 131.6, 132.3, 134.2, 134.3, 138.5, 143.4, 151.4, 165.1, 172.0.

**17d** (67.5 MHz, CDCl<sub>3</sub>/methanol-*d*<sub>4</sub> 5:1):  $\delta$  = 28.9, 46.5, 56.9, 57.7, 114.8, 114.9, 115.0, 124.3, 128.5, 129.2, 132.5, 135.1, 144.5, 152.5, 164.4, 166.7, 176.5.

**17e** (67.5 MHz, acetone-*d*<sub>6</sub>):  $\delta$  = 27.9, 45.8, 56.1, 56.2, 56.4, 111.2, 113.0, 113.3, 123.7, 123.8, 128.0, 129.3, 134.7, 143.8, 149.6, 152.1, 153.6, 165.4, 174.6.

**17f** (67.5 MHz, CDCl<sub>3</sub>/methanol-*d*<sub>4</sub> 10:1):  $\delta$  = 27.6, 44.6, 55.5, 56.4, 103.7, 105.9, 113.1, 122.9, 127.0, 133.7, 138.1, 143.1, 150.9, 160.6, 165.0, 174.4.

**17g** (67.5 MHz, DMSO-*d*<sub>6</sub>):  $\delta$  = 27.2, 45.2, 56.5, 56.7, 56.8, 106.4, 112.9, 122.5, 126.7, 132.3, 134.4, 140.9, 143.3, 151.1, 153.0, 164.7, 174.1.

## Elemental Analyses for selected compounds.

| Compound   | Formula                                                         | Found |      |      | Expected |      |      |
|------------|-----------------------------------------------------------------|-------|------|------|----------|------|------|
|            |                                                                 | C     | H    | N    | C        | H    | N    |
| <b>7a</b>  | C <sub>26</sub> H <sub>27</sub> NO <sub>5</sub>                 | 71.9  | 6.27 | 3.16 | 72.04    | 6.28 | 3.23 |
| <b>7b2</b> | C <sub>26</sub> H <sub>27</sub> NO <sub>5</sub>                 | 71.7  | 6.26 | 3.25 | 72.04    | 6.28 | 3.23 |
| <b>7d</b>  | C <sub>26</sub> H <sub>27</sub> NO <sub>5</sub>                 | 72.2  | 6.25 | 3.22 | 72.04    | 6.28 | 3.23 |
| <b>7e</b>  | C <sub>27</sub> H <sub>29</sub> NO <sub>6</sub>                 | 69.8  | 6.37 | 3.06 | 69.96    | 6.31 | 3.02 |
| <b>8a</b>  | C <sub>18</sub> H <sub>19</sub> NO <sub>4</sub>                 | 68.6  | 6.10 | 4.30 | 68.99    | 6.11 | 4.47 |
| <b>8b</b>  | C <sub>18</sub> H <sub>19</sub> NO <sub>4</sub>                 | 68.9  | 6.28 | 4.28 | 68.99    | 6.11 | 4.47 |
| <b>8c</b>  | C <sub>18</sub> H <sub>19</sub> NO <sub>4</sub>                 | 68.5  | 6.17 | 4.45 | 68.99    | 6.11 | 4.47 |
| <b>8d</b>  | C <sub>19</sub> H <sub>21</sub> NO <sub>5</sub>                 | 65.0  | 6.16 | 3.60 | 66.46    | 6.16 | 4.08 |
| <b>8e</b>  | C <sub>20</sub> H <sub>23</sub> NO <sub>6</sub>                 | 63.9  | 6.16 | 3.60 | 64.33    | 6.21 | 3.75 |
| <b>9a</b>  | C <sub>18</sub> H <sub>20</sub> N <sub>2</sub> O <sub>6</sub> S | 54.8  | 5.38 | 7.50 | 55.09    | 5.14 | 7.14 |
| <b>9b</b>  | C <sub>18</sub> H <sub>20</sub> N <sub>2</sub> O <sub>6</sub> S | 54.8  | 5.21 | 6.99 | 55.09    | 5.14 | 7.14 |

## Supporting information

|            |                                              |      |      |      |       |      |       |
|------------|----------------------------------------------|------|------|------|-------|------|-------|
| <b>9c</b>  | $C_{18}H_{20}N_2O_6S$                        | 54.7 | 5.12 | 6.99 | 55.09 | 5.14 | 7.14  |
| <b>9d</b>  | $C_{19}H_{22}N_2O_7S$                        | 53.1 | 5.33 | 6.32 | 54.02 | 5.25 | 6.63  |
| <b>9e</b>  | $C_{20}H_{24}N_2O_8S$                        | 52.9 | 5.35 | 6.04 | 53.09 | 5.35 | 6.19  |
| <b>10a</b> | $C_{24}H_{23}NO_6S$                          | 63.5 | 5.11 | 3.20 | 63.56 | 5.11 | 3.09  |
| <b>11a</b> | $C_{17}H_{17}NO_6S$                          | 55.7 | 4.68 | 3.85 | 56.19 | 4.72 | 3.85  |
| <b>11b</b> | $C_{17}H_{17}NO_6S$                          | 56.0 | 4.80 | 3.67 | 56.19 | 4.72 | 3.85  |
| <b>11d</b> | $C_{16}H_{14}ClNO_5S$                        | 52.0 | 4.02 | 3.66 | 52.25 | 3.84 | 3.81  |
| <b>11e</b> | $C_{18}H_{17}NO_7S$                          | 55.3 | 3.42 | 4.42 | 55.24 | 4.38 | 3.58  |
| <b>12a</b> | $C_{17}H_{18}N_2O_8S_2$                      | 45.8 | 4.04 | 6.20 | 46.15 | 4.10 | 6.33  |
| <b>12c</b> | $C_{17}H_{18}N_2O_8S_2$                      | 45.8 | 4.08 | 6.21 | 46.15 | 4.10 | 6.33  |
| <b>12d</b> | $C_{16}H_{15}ClN_2O_7S_2$                    | 42.9 | 3.43 | 6.20 | 43.0  | 3.38 | 6.27  |
| <b>12e</b> | $C_{18}H_{18}N_2O_9S_2$                      | 46.0 | 3.93 | 5.87 | 45.95 | 3.86 | 5.95  |
| <b>14a</b> | $C_{25}H_{25}NO_4$                           | 73.8 | 6.41 | 3.29 | 74.42 | 6.25 | 3.47  |
| <b>14b</b> | $C_{25}H_{25}NO_4$                           | 74.1 | 6.36 | 3.46 | 74.42 | 6.25 | 3.47  |
| <b>14d</b> | $C_{25}H_{25}NO_4$                           | 74.1 | 6.45 | 3.53 | 74.42 | 6.25 | 3.47  |
| <b>14e</b> | $C_{26}H_{27}NO_5$                           | 72.2 | 6.32 | 3.06 | 72.04 | 6.28 | 3.23  |
| <b>14f</b> | $C_{26}H_{27}NO_5$                           | 71.7 | 6.13 | 3.36 | 72.02 | 6.28 | 3.23  |
| <b>14g</b> | $C_{27}H_{29}NO_6$                           | 69.5 | 6.14 | 3.01 | 69.96 | 6.31 | 3.02  |
| <b>15a</b> | $C_{25}H_{23}NO_5$                           | 71.6 | 5.55 | 3.35 | 71.93 | 5.55 | 3.36  |
| <b>15b</b> | $C_{25}H_{23}NO_5$                           | 71.6 | 5.53 | 3.34 | 71.93 | 5.55 | 3.36  |
| <b>15c</b> | $C_{25}H_{20}N_2O_4$<br>0.25H <sub>2</sub> O | 71.7 | 4.84 | 6.71 | 72.02 | 4.96 | 6.72  |
| <b>15d</b> | $C_{25}H_{23}NO_5$                           | 71.7 | 5.54 | 3.26 | 71.93 | 5.55 | 3.36  |
| <b>15e</b> | $C_{26}H_{25}NO_6$                           | 69.7 | 5.61 | 3.09 | 69.79 | 5.63 | 3.13  |
| <b>15f</b> | $C_{26}H_{25}NO_6$                           | 69.4 | 5.64 | 3.18 | 69.79 | 5.63 | 3.13  |
| <b>15g</b> | $C_{27}H_{27}NO_7$                           | 67.5 | 5.73 | 2.91 | 67.91 | 5.70 | 2.93  |
| <b>16a</b> | $C_{18}H_{17}NO_5$<br>0.5H <sub>2</sub> O    | 64.3 | 5.08 | 4.17 | 64.28 | 5.39 | 4.16  |
| <b>16b</b> | $C_{18}H_{17}NO_5$                           | 65.8 | 5.20 | 4.21 | 66.05 | 5.23 | 4.28  |
| <b>16c</b> | $C_{18}H_{14}N_2O_4$                         | 66.5 | 4.55 | 8.39 | 67.07 | 4.38 | 8.69  |
| <b>16d</b> | $C_{18}H_{17}NO_5$                           | 66.2 | 5.25 | 4.14 | 66.05 | 5.23 | 4.28  |
| <b>16e</b> | $C_{19}H_{19}NO_6$                           | 63.6 | 5.34 | 3.98 | 63.86 | 5.36 | 3.92  |
| <b>16f</b> | $C_{19}H_{19}NO_6$                           | 63.8 | 5.37 | 3.90 | 63.86 | 5.36 | 3.92  |
| <b>16g</b> | $C_{20}H_{21}NO_7$<br>0.5H <sub>2</sub> O    | 60.4 | 5.58 | 3.49 | 60.60 | 5.59 | 3.53  |
| <b>17a</b> | $C_{18}H_{18}N_2O_7S$                        | 52.6 | 4.54 | 6.70 | 53.20 | 4.46 | 6.89  |
| <b>17b</b> | $C_{18}H_{18}N_2O_7S$                        | 53.2 | 4.53 | 6.66 | 53.20 | 4.46 | 6.89  |
| <b>17c</b> | $C_{18}H_{15}N_3O_6S$                        | 53.4 | 3.83 | 10.1 | 53.86 | 3.77 | 10.47 |
| <b>17d</b> | $C_{18}H_{18}N_2O_7S$                        | 53.1 | 4.41 | 6.85 | 53.20 | 4.46 | 6.89  |
| <b>17e</b> | $C_{19}H_{20}N_2O_8S$                        | 52.1 | 4.62 | 6.36 | 52.29 | 4.62 | 6.42  |
| <b>17f</b> | $C_{19}H_{20}N_2O_8S$                        | 52.3 | 4.68 | 6.32 | 52.29 | 4.62 | 6.42  |

## Supporting information

|            |                                                                 |      |      |      |       |      |      |
|------------|-----------------------------------------------------------------|------|------|------|-------|------|------|
| <b>17g</b> | C <sub>20</sub> H <sub>22</sub> N <sub>2</sub> O <sub>9</sub> S | 52.0 | 4.92 | 5.57 | 51.50 | 4.75 | 6.01 |
| <b>18a</b> | C <sub>19</sub> H <sub>21</sub> NO <sub>5</sub>                 | 66.8 | 6.10 | 4.00 | 66.46 | 6.16 | 4.08 |
| <b>18b</b> | C <sub>19</sub> H <sub>21</sub> NO <sub>5</sub>                 | 66.3 | 6.39 | 4.03 | 66.46 | 6.16 | 4.08 |
| <b>19a</b> | C <sub>19</sub> H <sub>22</sub> N <sub>2</sub> O <sub>7</sub> S | 54.4 | 5.43 | 6.38 | 54.02 | 5.25 | 6.63 |
| <b>19b</b> | C <sub>19</sub> H <sub>22</sub> N <sub>2</sub> O <sub>7</sub> S | 53.7 | 5.49 | 6.50 | 54.02 | 5.25 | 6.63 |

## Computational Methods.

The Schrödinger software running under Maestro version 9.2.112 was used for all computational work. The crystal structure of **17f** has been solved. One molecule was taken from this structure and run through a brief geometry optimisation procedure. This resulted in a slight change in the dihedral angle A-B-C-D from 31.6° to 29.0° and in the dihedral angle B-C-D-E from 48.1° to 47.2° (Figure 1).

**Figure 1.** Dihedral angles ABCD and BCDE in **17f**.

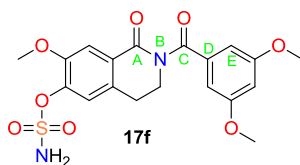

The Current Energy protocol within the MacroModel program was used to calculate the energy in the compound.

|                           |                  |
|---------------------------|------------------|
| Total Energy =            | -224.1113 kJ/mol |
| Stretch =                 | 13.3092 kJ/mol   |
| Bend =                    | 42.5224 kJ/mol   |
| Torsion =                 | 80.0845 kJ/mol   |
| Improper Torsion =        | 6.7536 kJ/mol    |
| VDW =                     | 89.2127 kJ/mol   |
| Electrostatic =           | -344.3110 kJ/mol |
| Explicit Hydrogen Bonds = | 0.0000 kJ/mol    |
| Cross Terms =             | 0.0000 kJ/mol    |
| Solvation =               | -111.6828 kJ/mol |

Both dihedral angles were manually and independently adjusted in steps of 30° and the energy of the conformers was calculated as above. **16g** and **17g** were built by altering the crystal structure of **17f** to yield the desired structure which was then run through a brief geometry optimisation procedure. Conformers were generated and molecular energies calculated as described above.

**Table 1.** Conformer Energies for **17f**. <sup>a</sup>Data in kJ/mol.

| Dihedral<br>A-B-C-D | Dihedral B-C-D-E |        |        |        |        |         |
|---------------------|------------------|--------|--------|--------|--------|---------|
|                     | 17.2             | 47.2   | 77.2   | 107.2  | 137.2  | 167.2   |
| <b>29.0</b>         | -153.8           | -224.1 | -215.9 | -187.1 | 7098.6 | 23188.6 |
| <b>59.0</b>         | -202.3           | -204.3 | -192.5 | -178.7 | -30.8  | -157.6  |

Supporting information

|              |          |        |        |        |         |         |
|--------------|----------|--------|--------|--------|---------|---------|
| <b>89.0</b>  | -179.4   | -177.3 | -165.3 | -165.3 | -174.4  | -176.7  |
| <b>119.0</b> | -165.7   | -66.7  | -156.7 | -166.6 | -179.4  | -180.8  |
| <b>149.0</b> | 2743.1   | 5097.0 | -165.4 | -183.4 | -195.4  | -139.4  |
| <b>179.0</b> | 3118.5   | -86.8  | -185.3 | -187.5 | -109.5  | 3146.5  |
| <b>209.0</b> | -71.2    | -200.9 | -192.6 | -171.8 | 11999.6 | 3011.5  |
| <b>239.0</b> | -181.4   | -188.7 | -177.1 | -159.9 | 178.7   | 0.013   |
| <b>269.0</b> | -173.6   | -171.1 | -162.1 | -162.4 | -168.7  | -168.6  |
| <b>299.0</b> | -107.4   | 300.1  | -159.4 | -176.2 | -188.2  | -183.6  |
| <b>329.0</b> | 159239.8 | 2400.1 | -178.4 | -200.0 | -203.7  | 87.4    |
| <b>359.0</b> | 34002.1  | -133.4 | -208.0 | -204.5 | 48.8    | 20604.9 |
